# Supplementary material
Source: publisher figshare collection journal article supplement (https://acs.figshare.com/ndownloader/files/4573156)

Steroidal Glycosides from *Dregea sinensis* var. *corrugata* Based on  
Chemical Screening with Liquid Chromatography-electrospray Ionization  
Tandem Mass Spectrometry (LC-ESI-MS<sup>n</sup>)

Yun-Bao Liu,<sup>1</sup> E-Nuo Su,<sup>2</sup> Jian-Bei Li,<sup>†</sup> Jin-Lan Zhang,<sup>†</sup> Shi-Shan Yu,<sup>\*,†</sup> Jing Qu,<sup>†</sup> Jing Liu,<sup>†</sup>  
Yong Li<sup>†</sup>

*Key Laboratory of Bioactive Substances and Resources Utilization of Chinese Herbal Medicine,  
Ministry of Education & Institute of Materia Medica, Peking Union Medical College and Chinese  
Academy of Medical Sciences, No. 1 Xian Nong Tan Street, Beijing 100050, PR China, Shenyang  
Pharmaceutical University, Shenyang 110016, PR China*

---

\* To whom correspondence should be addressed. E-mail: yushishan@imm.ac.cn; Tel.: +86-10-63165324; +86-10-60212125; Fax: +86-10-63017757

<sup>1</sup> Institute of Materia Medica, Peking Union Medical College and Chinese Academy of Medical Sciences

<sup>2</sup> Shenyang Pharmaceutical University

## Support Information

**Figure S1.** ESI-MS<sup>n</sup> spectra of new compound 1

**Figure S2.** <sup>1</sup>H NMR (pyridine-d<sub>5</sub> 500 M Hz) spectra of new compound 1

**Figure S3.** <sup>13</sup>C NMR (pyridine-d<sub>5</sub> 125 M Hz) spectra of new compound 1

**Figure S4.** Dept spectra of new compound 1

**Figure S5.** COSY spectra of new compound 1

**Figure S6.** HMQC spectra of new compound 1

**Figure S7.** HMBC spectra of new compound 1

**Figure S8.** ESI-MS<sup>n</sup> spectra of new compound 4

**Figure S9.** <sup>1</sup>H NMR (pyridine-d<sub>5</sub> 500 M Hz) spectra of new compound 4

**Figure S10.** <sup>13</sup>C NMR (pyridine-d<sub>5</sub> 125 M Hz) spectra of new compound 4

**Figure S11.** Dept spectra of new compound 4

**Figure S12.** COSY spectra of new compound 4

**Figure S13.** HMQC spectra of new compound 4

**Figure S14.** HMBC spectra of new compound 4

**Figure S15.** ESI-MS<sup>n</sup> spectra of new compound 7

**Figure S16.** <sup>1</sup>H NMR (pyridine-d<sub>5</sub> 500 M Hz) spectra of new compound 7

**Figure S17.** <sup>13</sup>C NMR (pyridine-d<sub>5</sub> 125 M Hz) spectra of new compound 7

**Figure S18.** Dept spectra of new compound 7

**Figure S19.** COSY spectra of new compound 7

**Figure S20.** HMQC spectra of new compound 7

**Figure S21.** HMBC spectra of new compound 7

**Figure S1. ESI-MS<sup>n</sup> spectra of new compound 1**

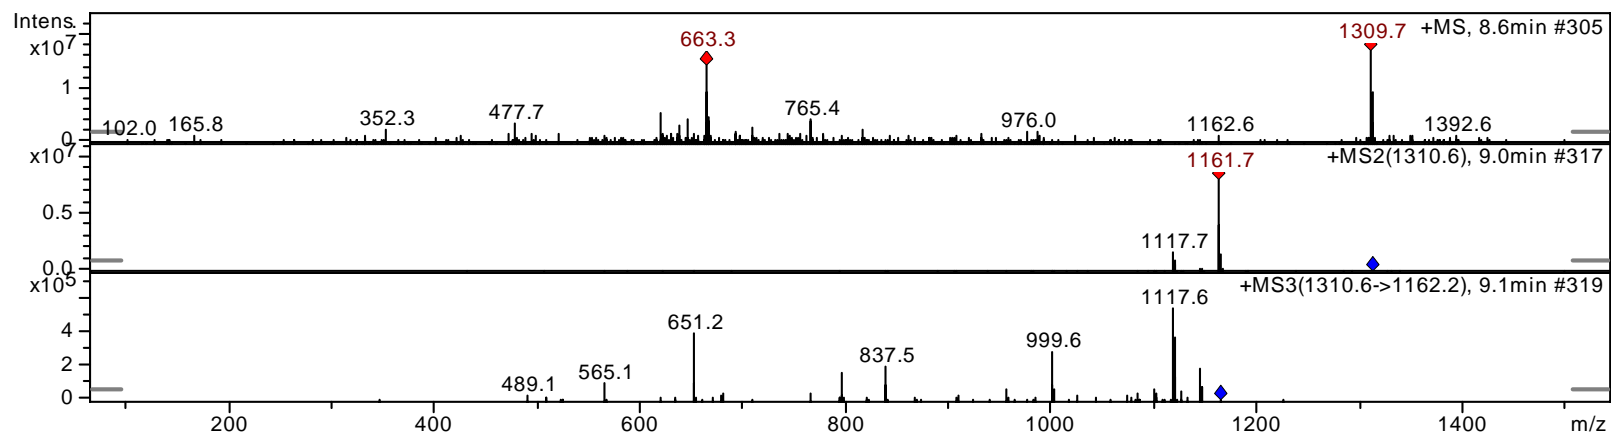

Figure S2.  $^1\text{H}$  NMR (pyridine- $d_5$  500 M Hz) spectra of new compound 1

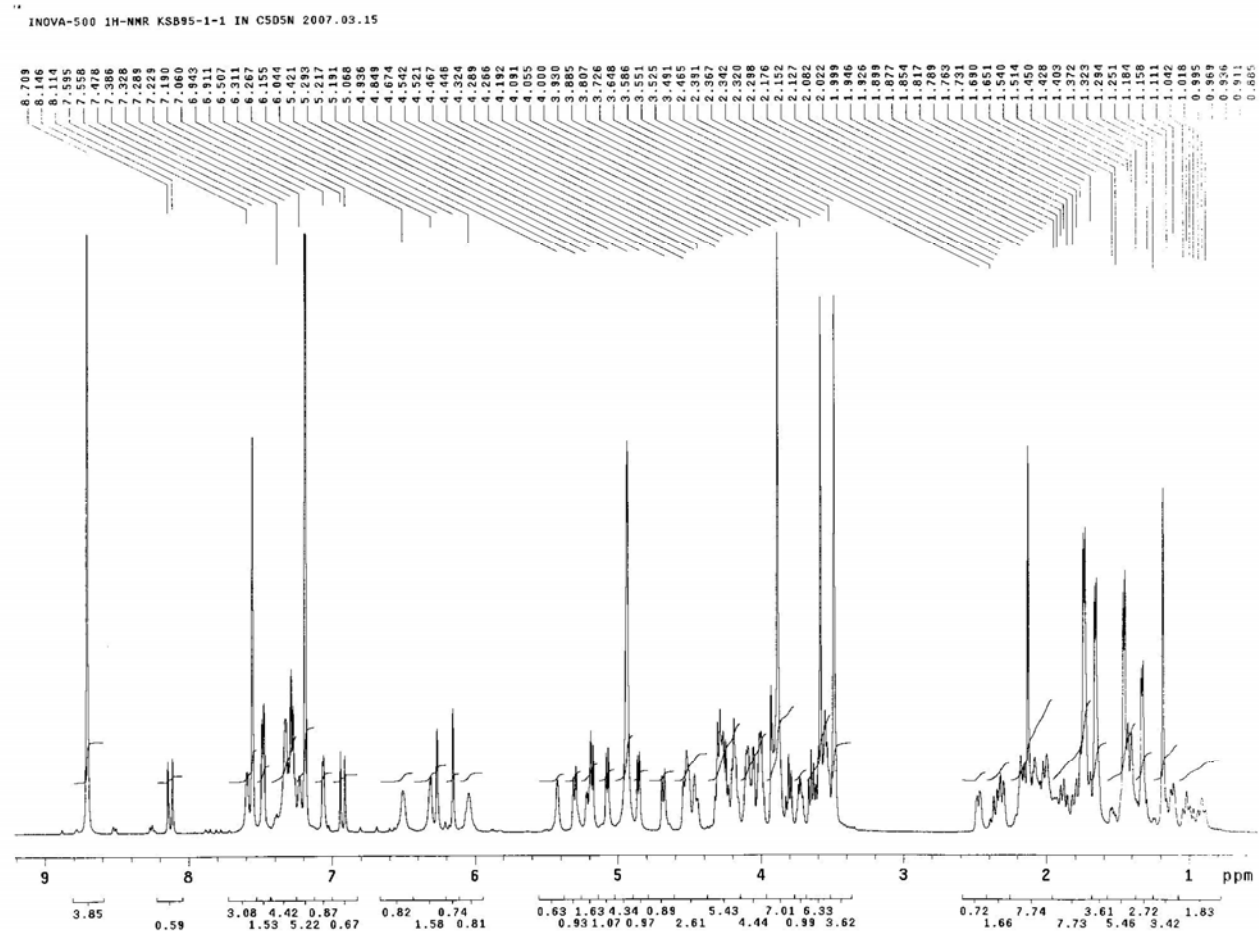

**Figure S3.**  $^{13}\text{C}$  NMR (pyridine- $\text{d}_5$  500 M Hz) spectra of new compound 1

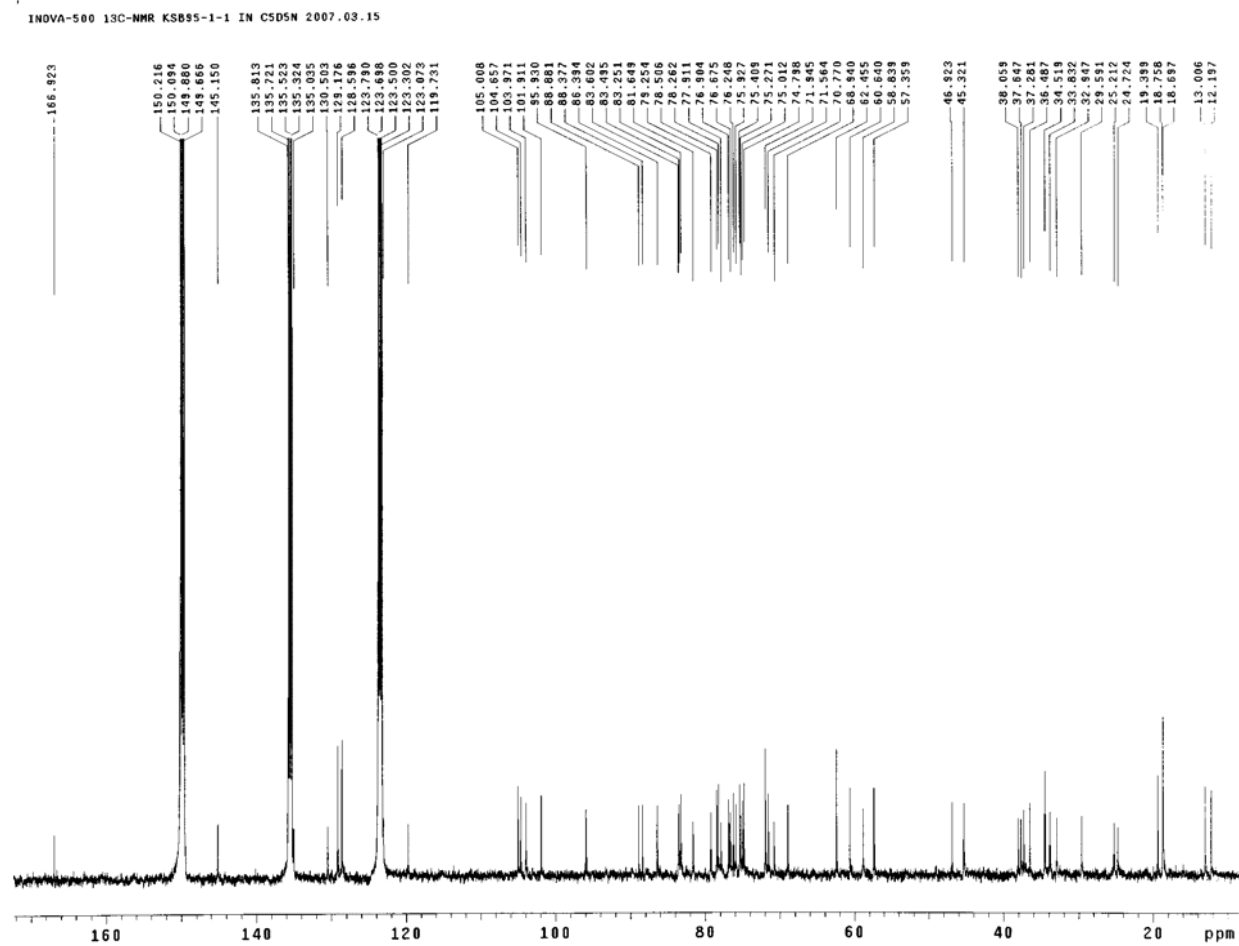

**Figure S4. Dept spectra of new compound 1**

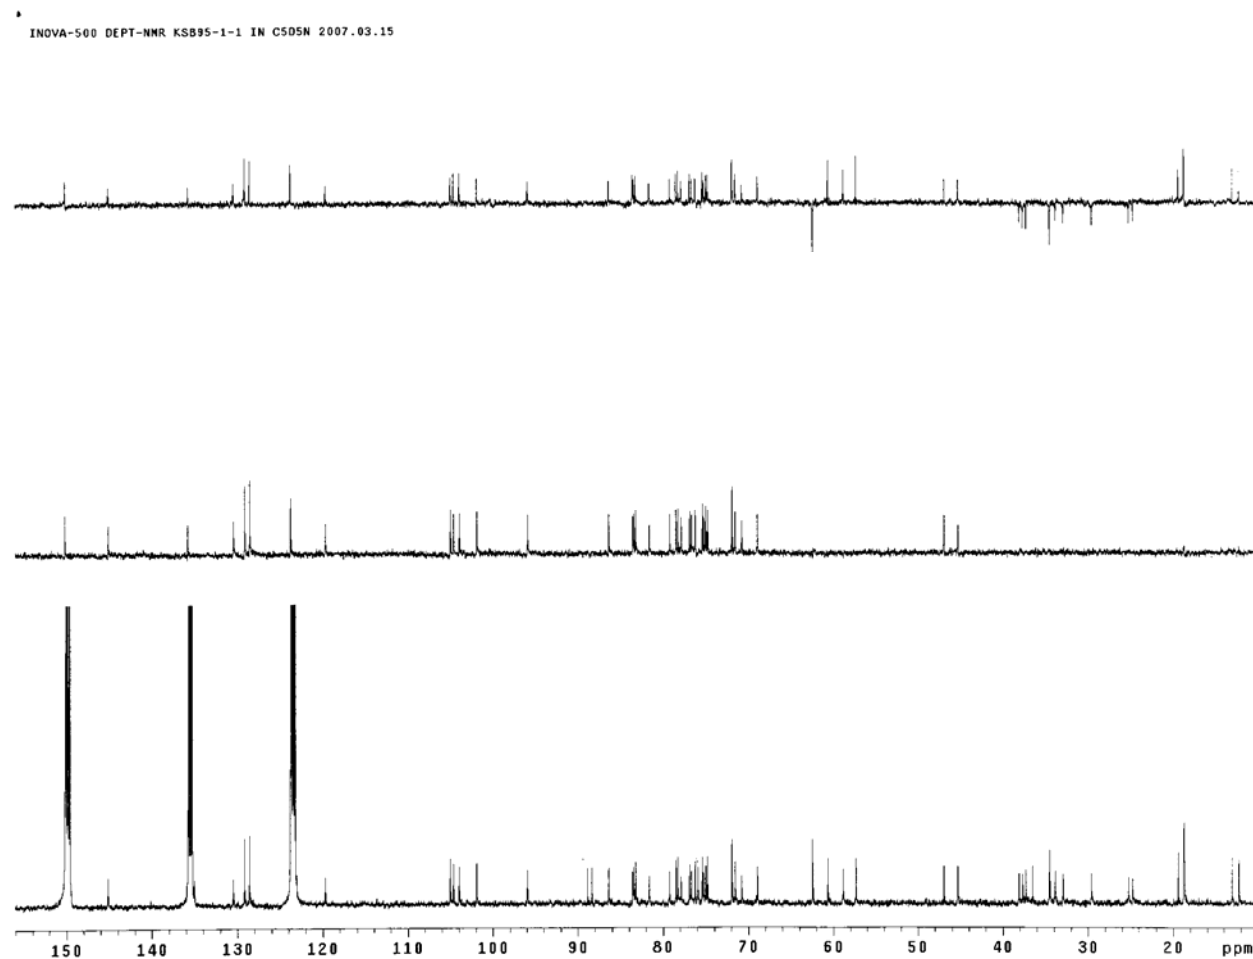

Figure S5. COSY spectra of new compound 1

INOVA-501 gCOSY KSB95-1-1 IN C505N 07.05.08

Solvent: Pyridine  
Temp. 25.0 C / 288.1 K  
INOVA-500 "INM-501"

Relax. delay 1.000 sec  
Acq. time 0.218 sec  
Width 4700.9 Hz  
2D Width 4700.9 Hz  
2 repetitions  
256 increments  
OBSERVE H1, 499.7702145 MHz  
DATA PROCESSING  
Sine bell 0.109 sec  
F1 DATA PROCESSING  
Sine bell 0.026 sec  
FT size 2048 x 2048  
Total time 11 min, 3 sec

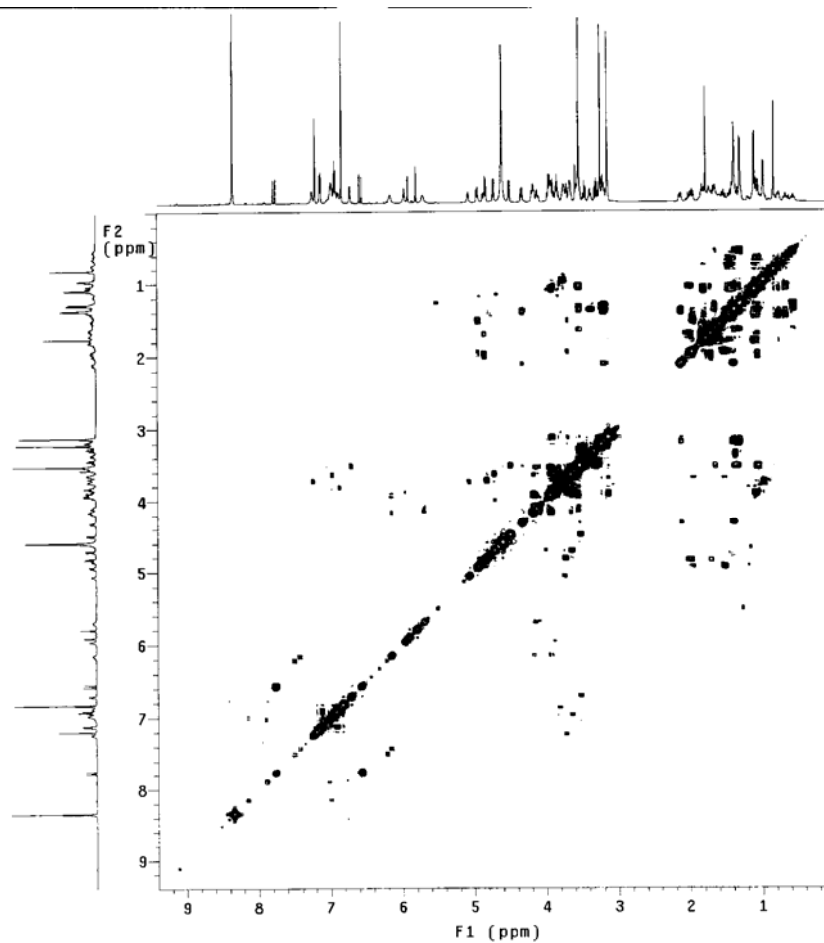

Figure S6. HMQC spectra of new compound 1

INOVA-501 gHSQC KS895-1-1 IN C5D5N 07.05.08

Solvent: Pyridine  
Temp: 25.0 C / 298.1 K  
User: 1-14-87  
INOVA-500 "IMH-501"

Relax. delay 1.000 sec  
Acq. time 0.219 sec  
Width 4672.1 Hz  
2D Width 21511.2 Hz  
16 repetitions  
256 increments  
OBSERVE H1, 499.7702145 MHz  
DECOUPLE C13, 125.6785340 MHz  
Power 48 dB  
on during acquisition  
off during delay  
GARP-1 modulated  
DATA PROCESSING  
Sine bell 0.046 sec  
F1 DATA PROCESSING  
Sine bell 0.006 sec  
FT size 2048 x 4096  
Total time 1 hr, 28 min, 53 sec

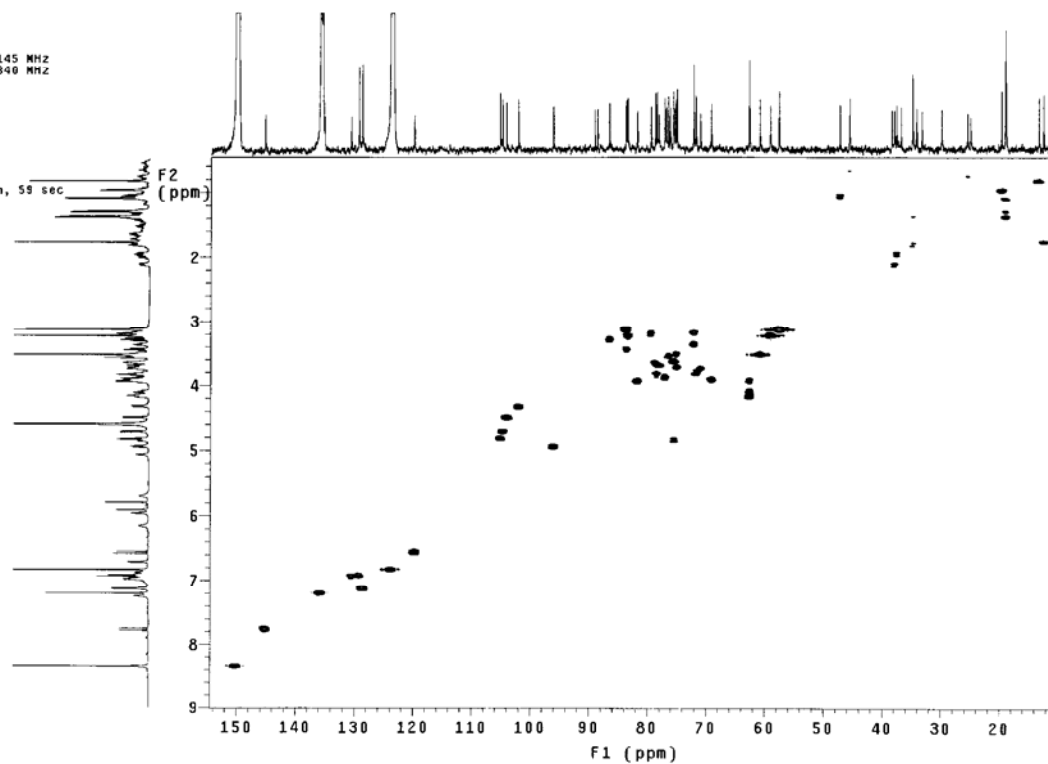



Figure S7. HMBC spectra of new compound 1

INOVA-501 gHMBC KSB95-1-1 IN C505N 07.05.08

Solvent: Pyridine  
Temp. 25.0 C / 298.1 K  
User: i-14-87  
INOVA-500 "JNM-501"

Relax. delay 1.000 sec  
Acq. time 0.221 sec  
Width 4643.1 Hz  
2D Width 21511.2 Hz  
32 repetitions  
320 increments  
OBSERVE H1, 499.7702145 MHz  
DATA PROCESSING  
Sine bell 0.046 sec  
F1 DATA PROCESSING  
Sine bell 0.004 sec  
FT size 2048 x 4096  
Total time 3 hr, 44 min, 13 sec

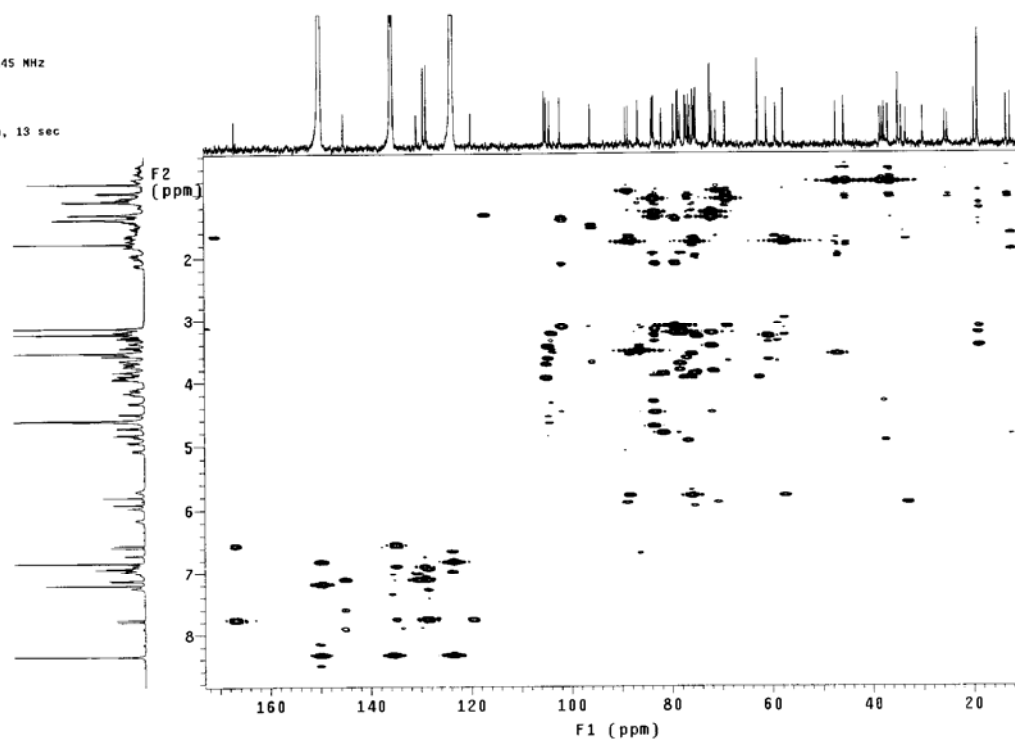

Figure S8. ESI-MS<sup>n</sup> spectra of new compound 4

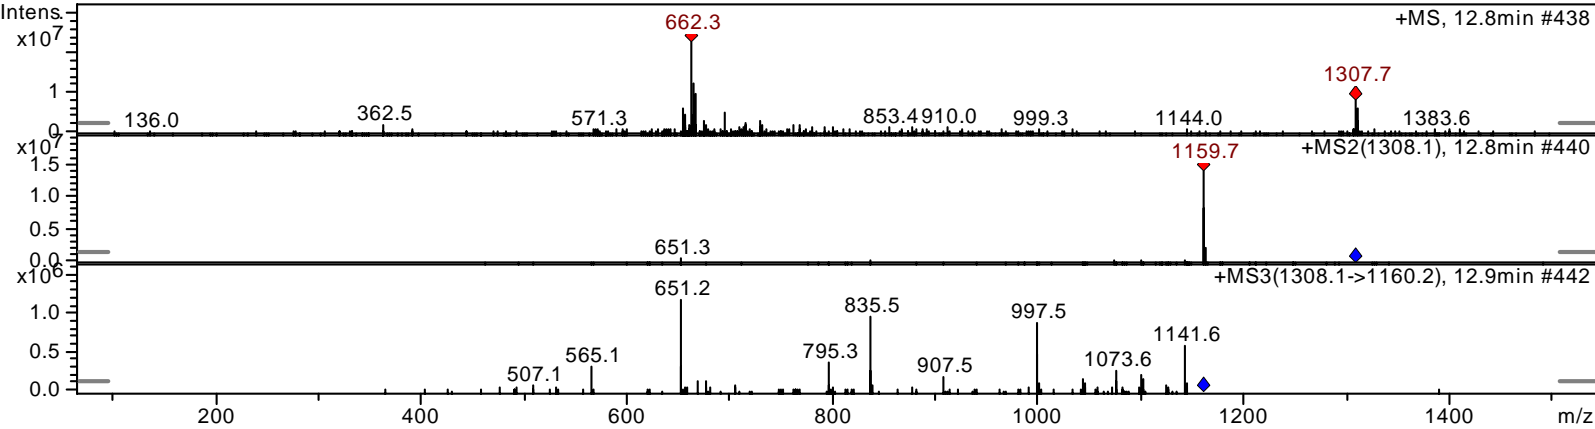

Figure S9.  $^1\text{H}$  NMR (pyridine- $d_5$  500 M Hz) spectra of new compound 2

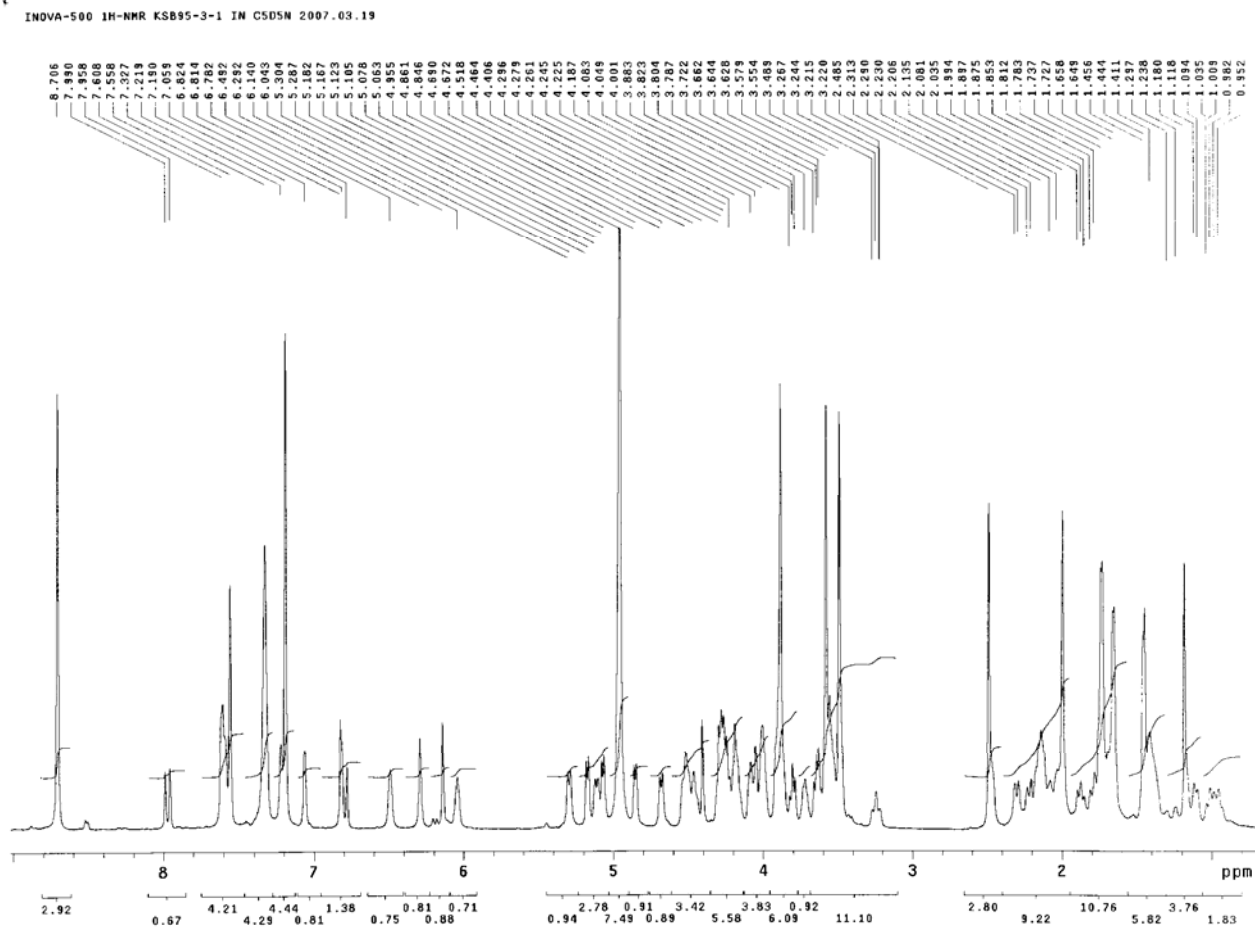

Figure S10.  $^{13}\text{C}$  NMR (pyridine- $d_5$  125 M Hz) spectra of compound 4

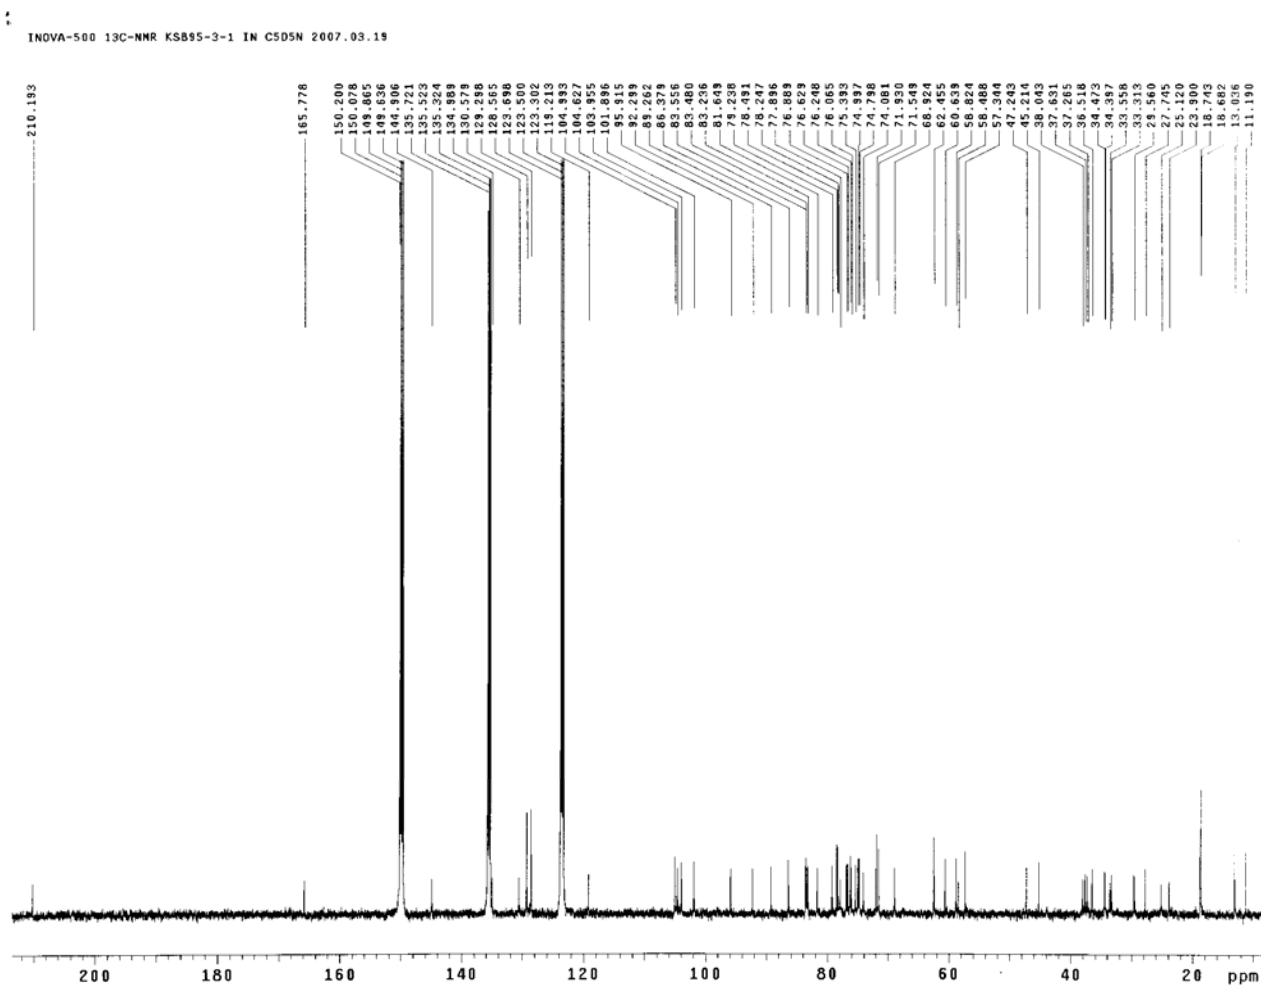

**Figure S11. Dept spectra of new compound 4**

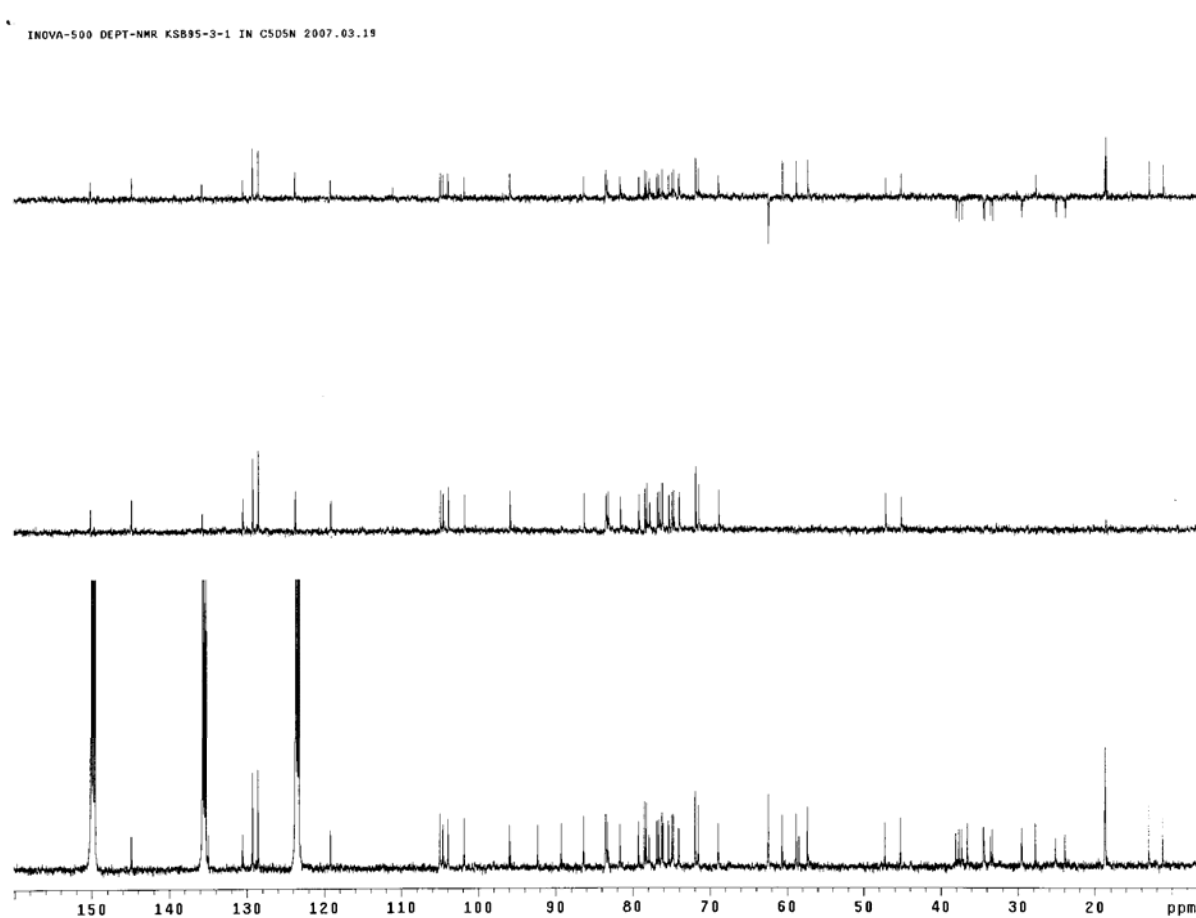

Figure S12. COSY spectra of new compound 4

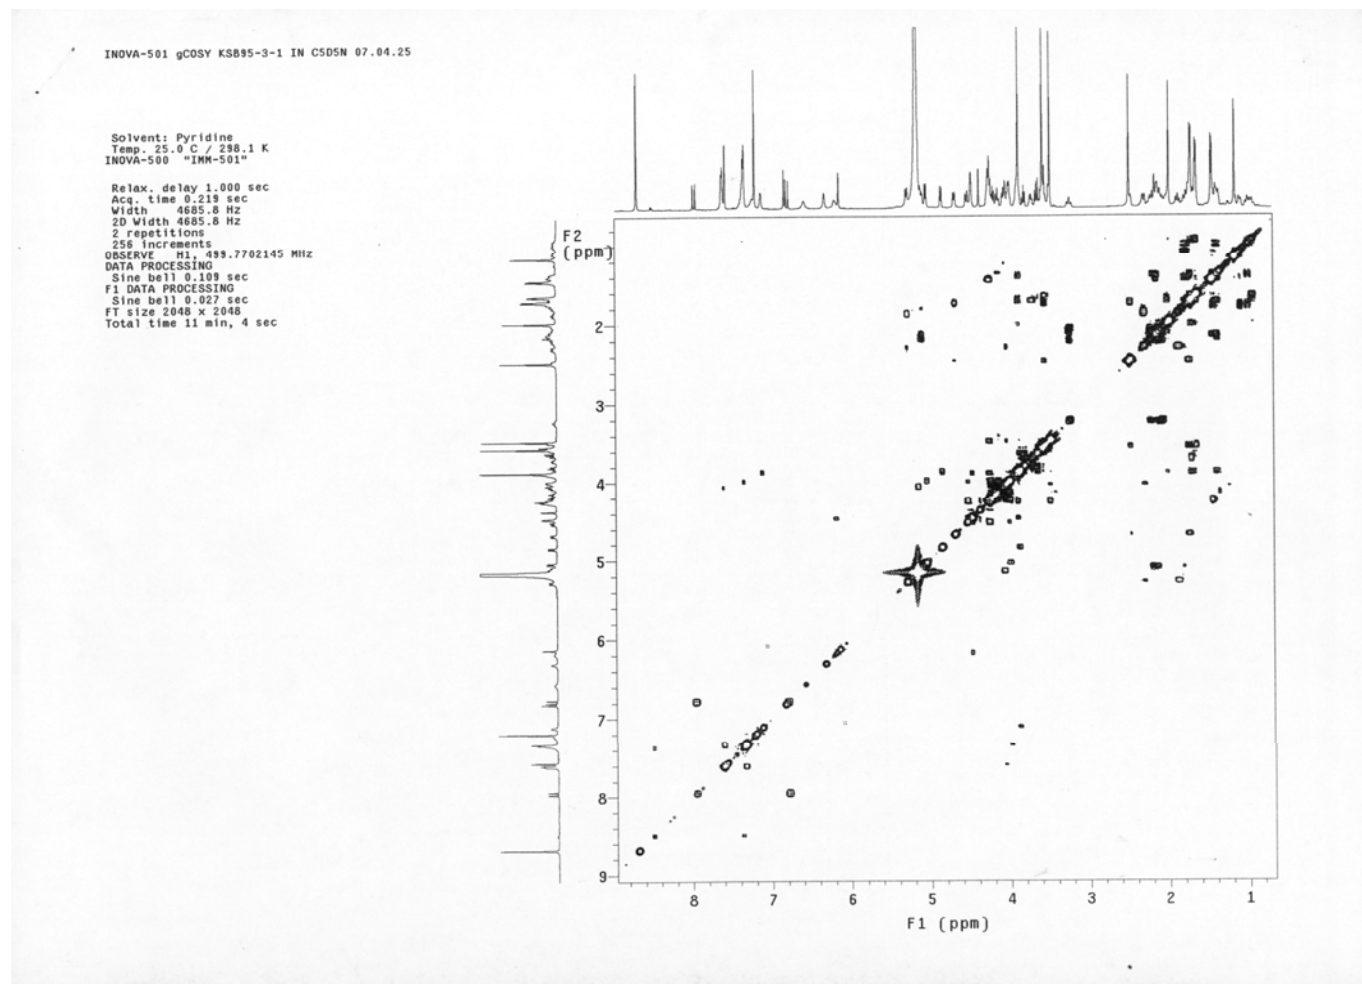

Figure S13. HMQC spectra of new compound 4

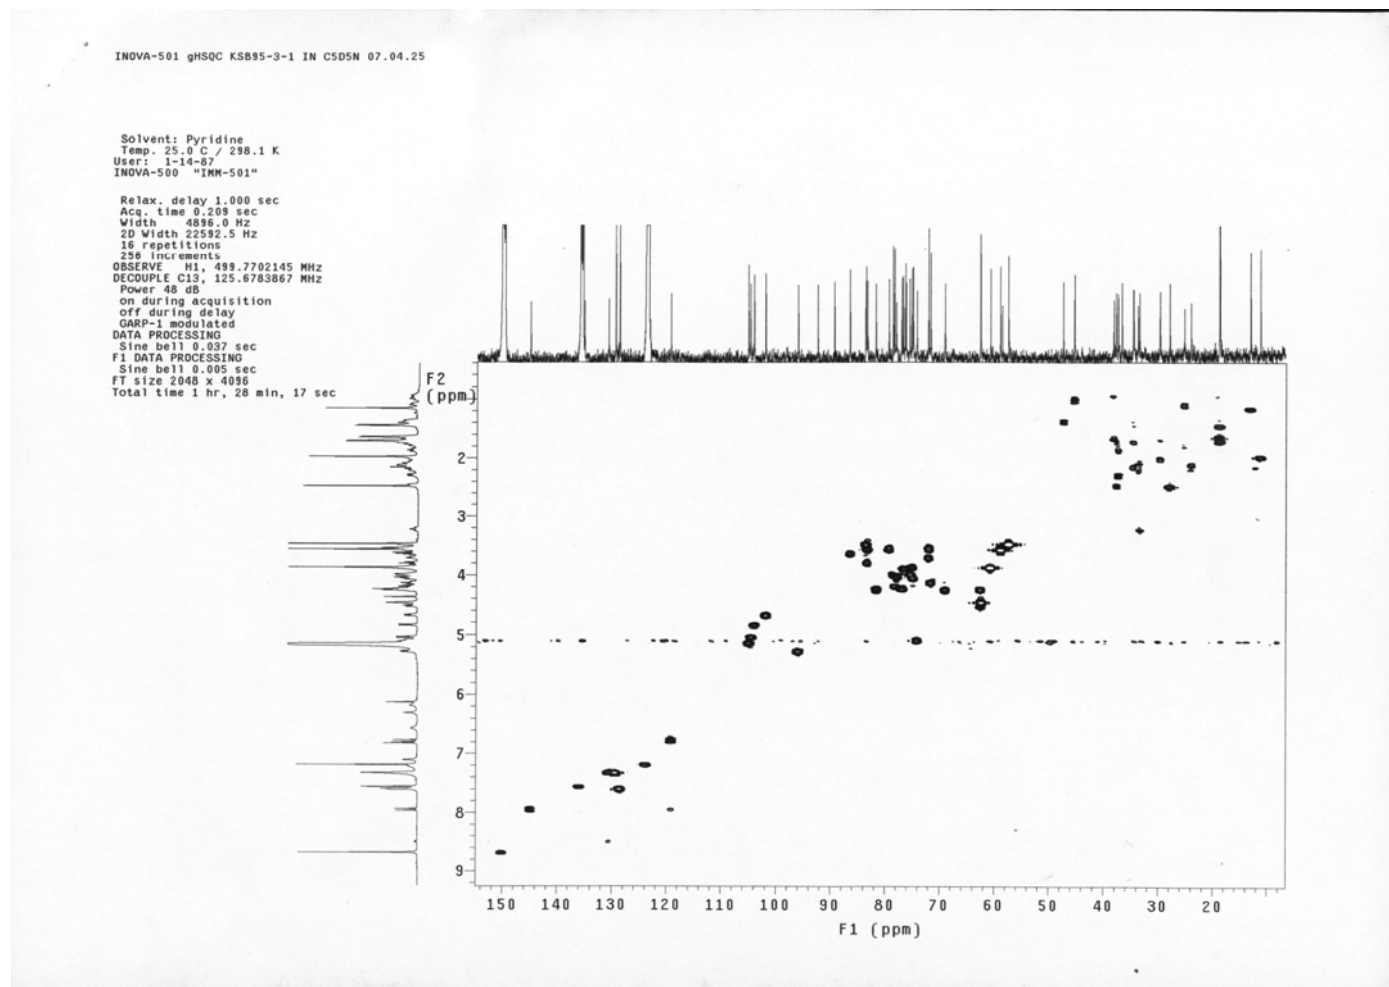

Figure S14. HMBC spectra of new compound 4

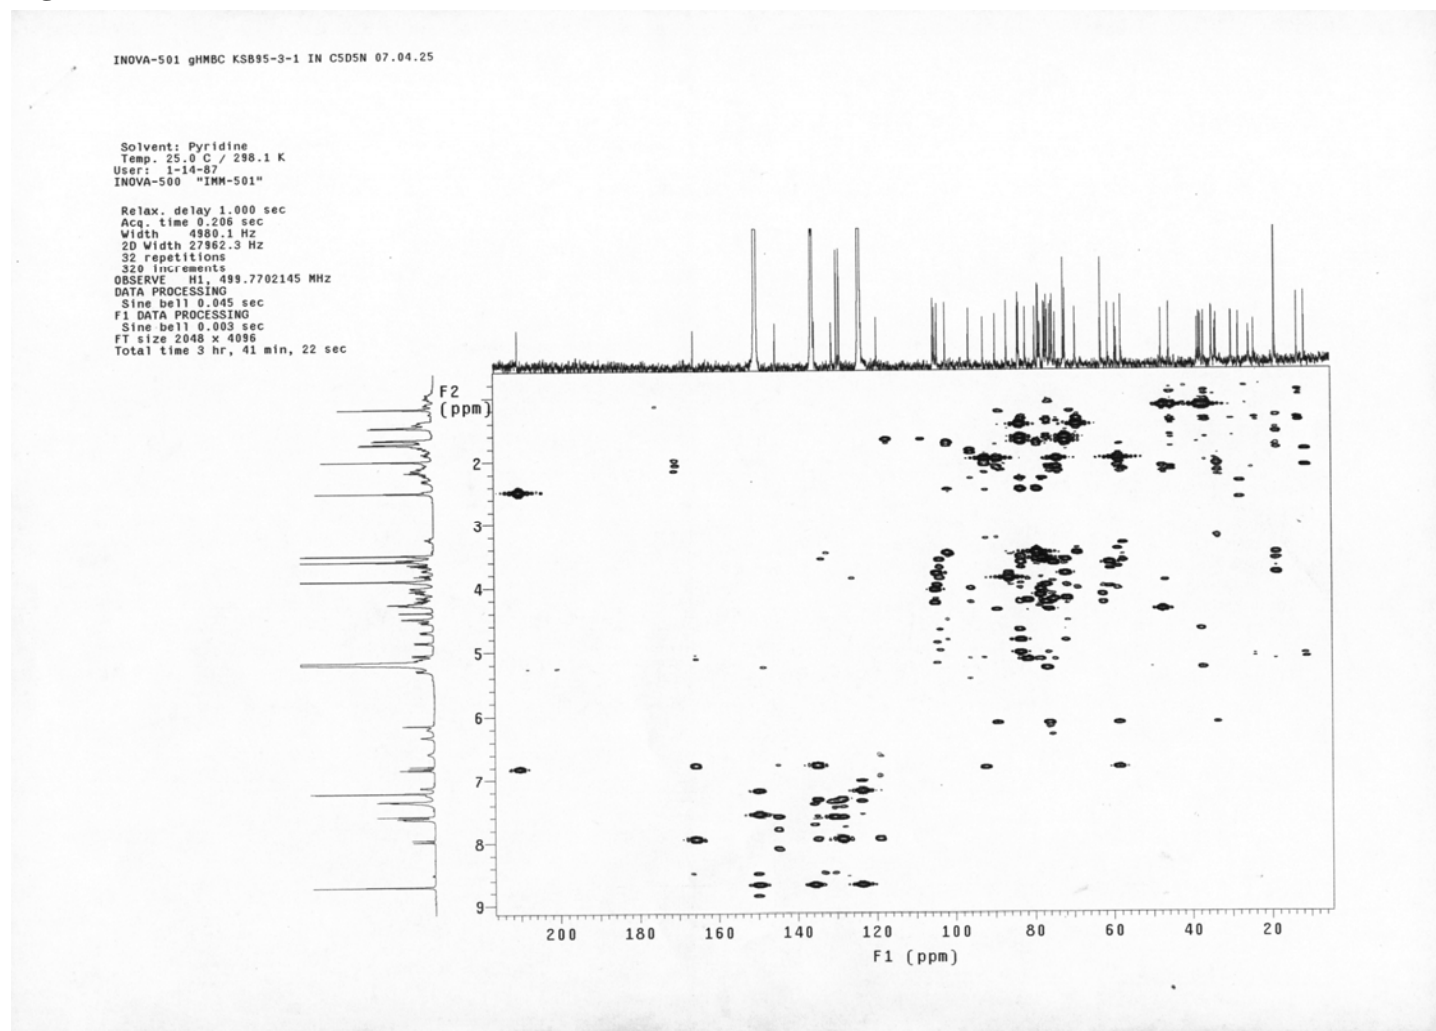



**Figure S15 ESI-MS<sup>n</sup> spectra of new compound 7**

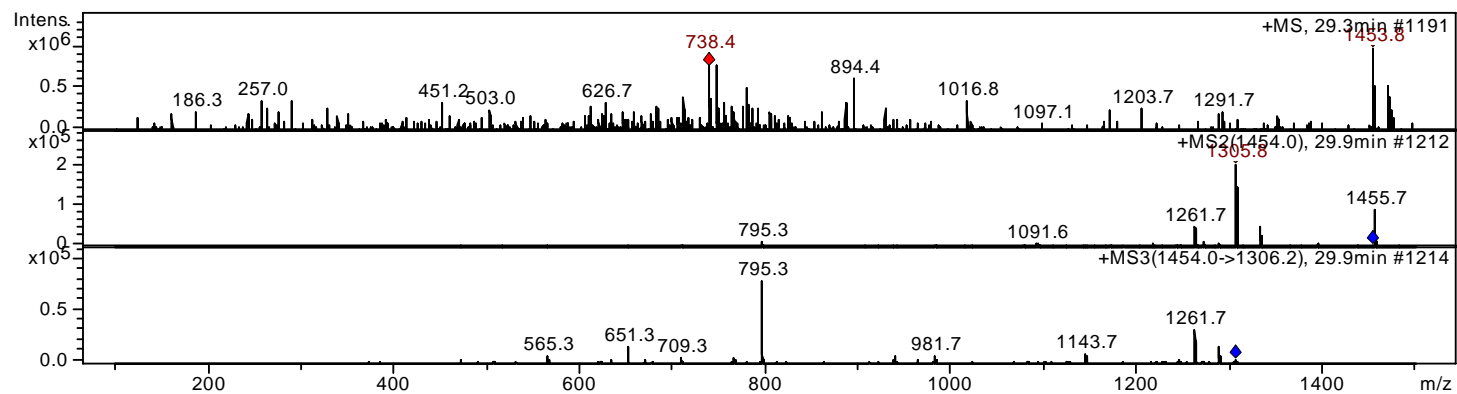

Figure S16.  $^1\text{H}$  NMR (pyridine- $d_5$  500 M Hz) spectra of new compound 7

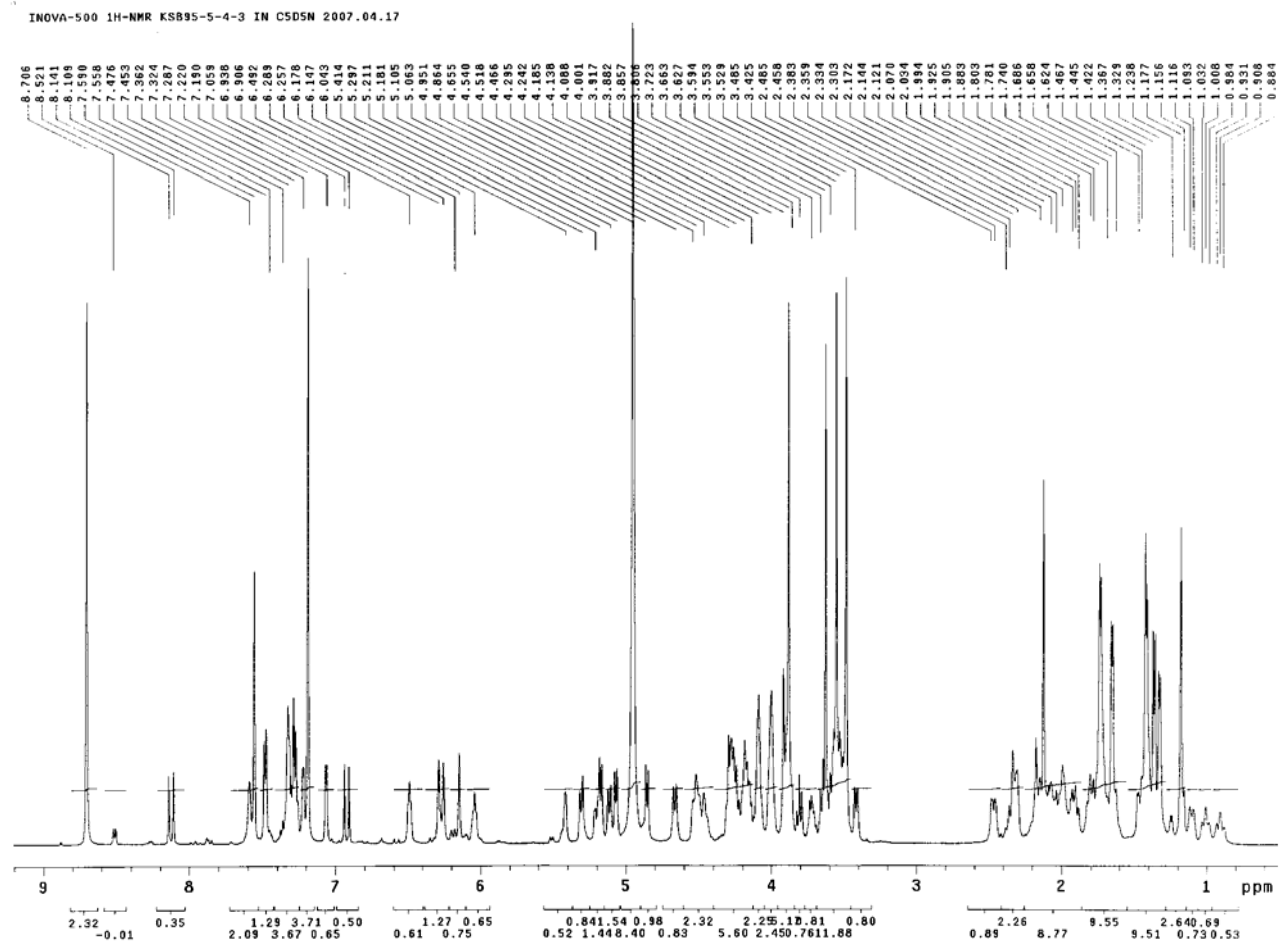

Figure S17.  $^{13}\text{C}$  NMR (pyridine- $d_5$  125 M Hz) spectra of new compound 7

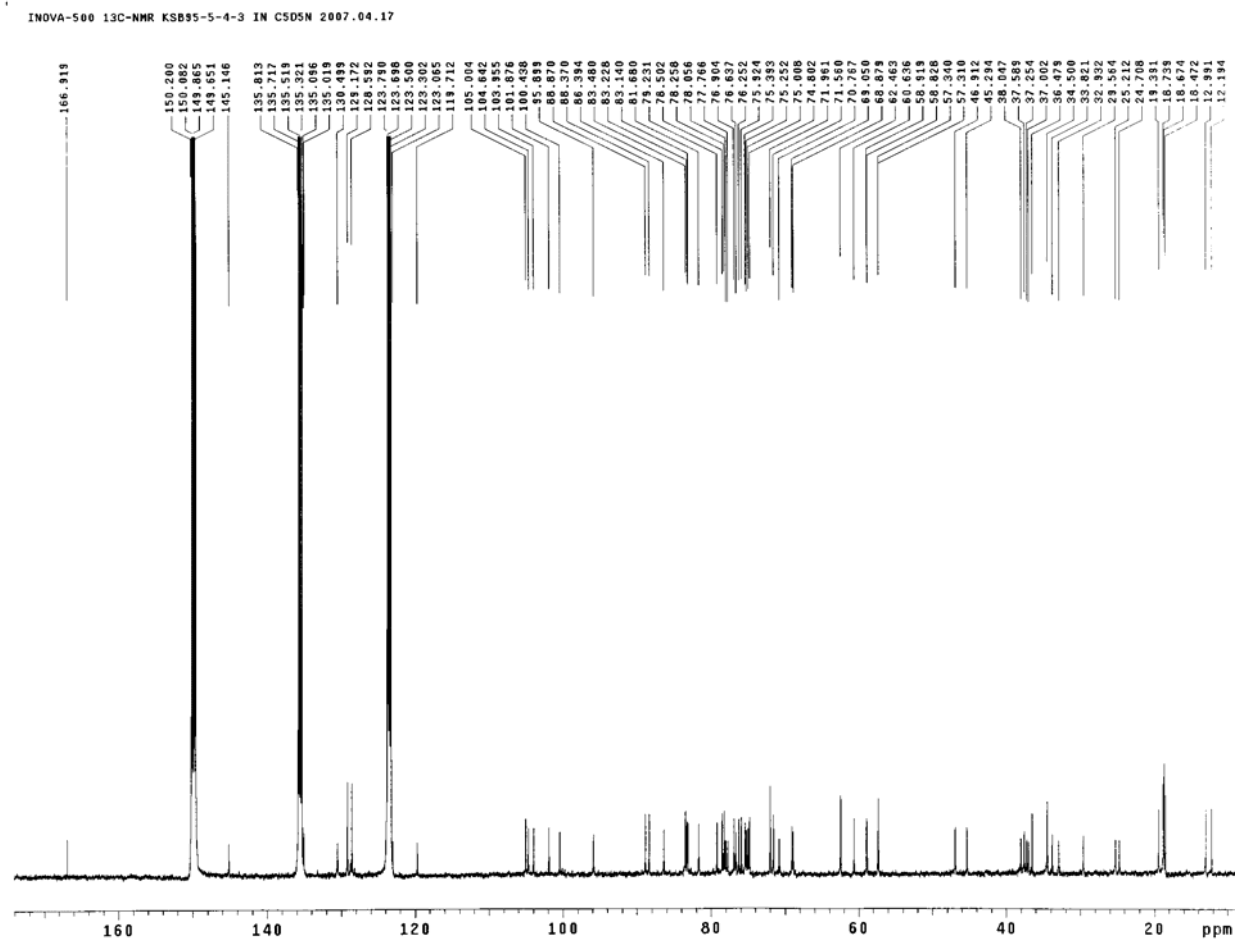

**Figure S18. Dept spectra of new compound 7**

INOVA-500 DEPT-NMR KSB95-5-4-3 IN C5D5N 2007.04.17

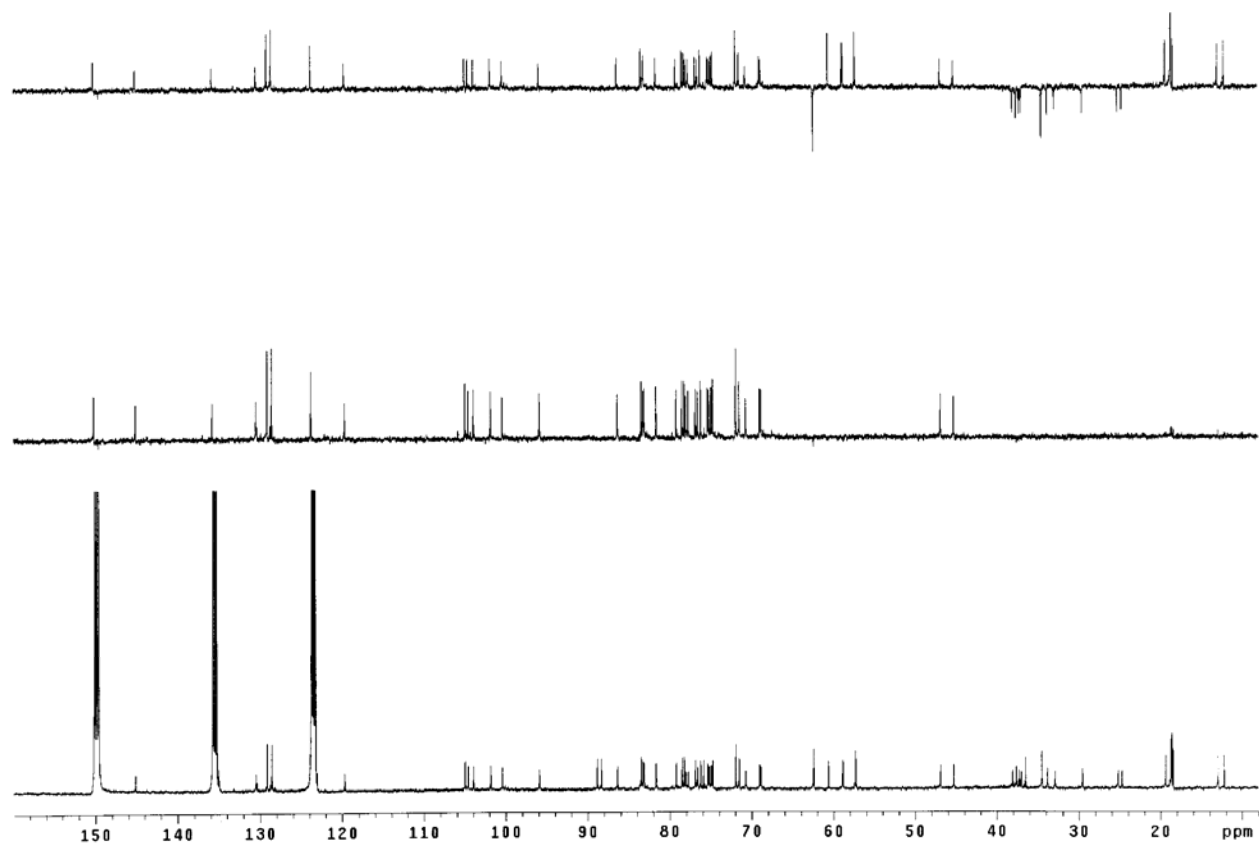

Figure S19. COSY spectra of new compound 7

INOVA-501 gCOSY KSB95-5-4-3 IN C5DSN 07.05.10

Solvent: Pyridine  
Temp: 25.0 C / 298.1 K  
INOVA-500 "1H-501"  
  
Relax. delay 1.000 sec  
Acq. time 0.236 sec  
Width 4344.5 Hz  
2D Width 4344.5 Hz  
2 repetitions  
256 increments  
OBSERVE H1, 499.7702145 MHz  
DATA PROCESSING  
Sine bell 0.118 sec  
F1 DATA PROCESSING  
Sine bell 0.029 sec  
FT size 2048 x 2048  
Total time 11 min, 14 sec

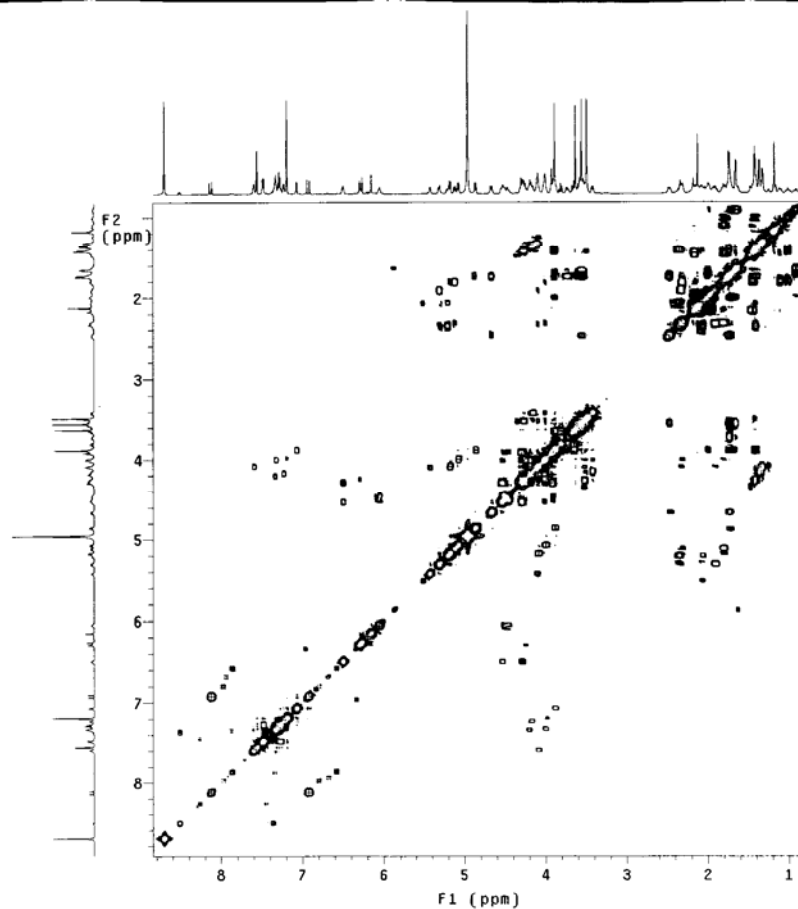

Figure S20. HMQC spectra of new compound 7

INOVA-501 gHSQC KSB95-5-4-3 IN C5D5N 07.05.10

Solvent: Pyridine  
Temp. 25.0 °C / 298.1 K  
User: 1-14-87  
INOVA-500 "IMM-501"

Relax. delay 1.000 sec  
Acq. time 0.232 sec  
Width 4012.1 Hz  
2D Width 21248.3 Hz  
16 repetitions  
256 increments  
OBSERVE H1, 499.7702145 MHz  
DECOUPLE C13, 125.6784017 MHz  
Power 48 dB  
on during acquisition  
off during delay  
GARP-1 modulated  
DATA PROCESSING  
Sine bell 0.050 sec  
F1 DATA PROCESSING  
Sine bell 0.006 sec  
F1 size 2048 x 4096  
Total time 1 hr, 29 min, 53 sec

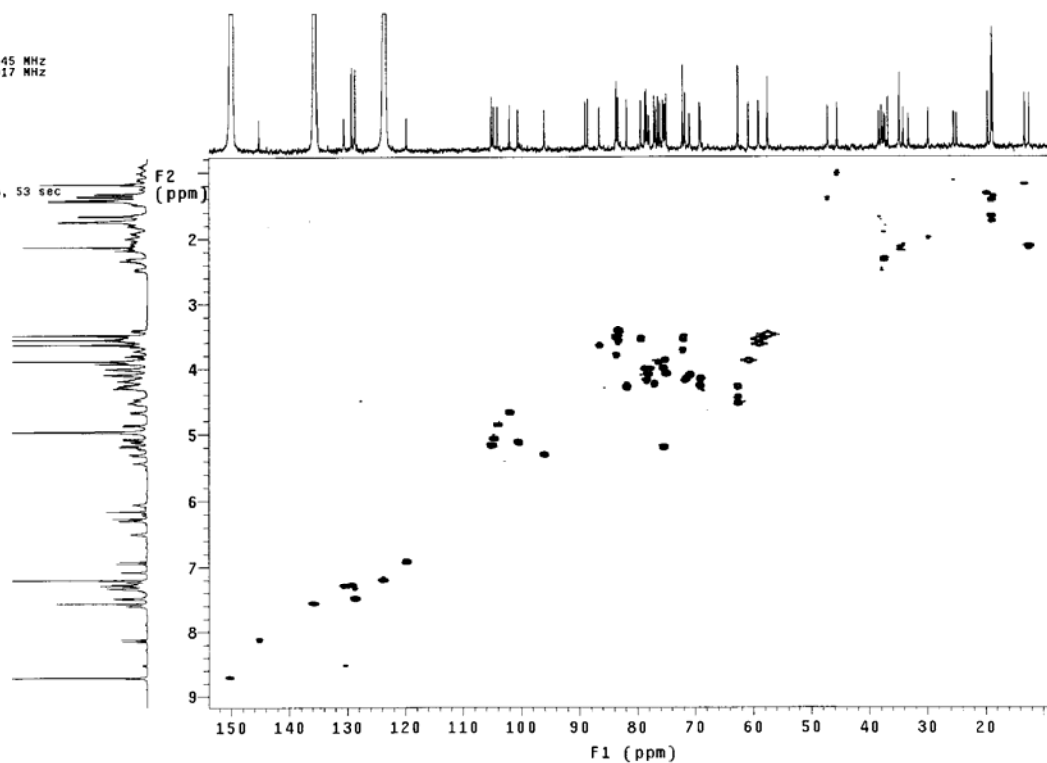

Figure S21. HMBC spectra of new compound 7

INOVA-501 gHMBC KSB95-5-4-3 IN C505N 07.05.11

Solvent: Pyridine  
Temp. 25.0 C / 298.1 K  
User: 1-14-87  
INOVA-500 "1HN-501"

Relax. delay 1.000 sec  
Acq. time 0.219 sec  
Width 4682.2 Hz  
2D Width 22061.1 Hz  
32 repetitions  
320 increments  
OBSERVE R1, 499.7702145 MHz  
DATA PROCESSING  
Sine bell 0.050 sec  
F1 DATA PROCESSING  
Sine bell 0.004 sec  
FT size 2048 x 4096  
Total time 3 hr, 43 min, 52 sec

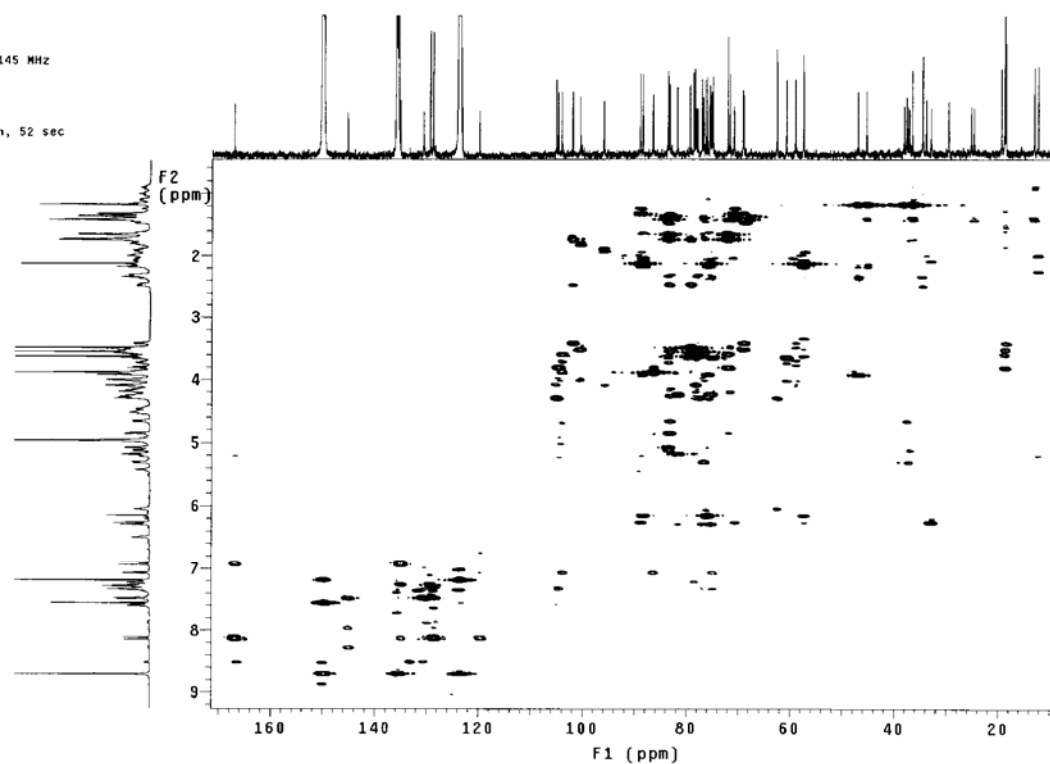

Supplement: Supplementary file 1 [file 4573156]
